# Supplementary material for: Late Holocene overflow floods of the Yellow River led to the shrinkage of downstream lakes
Source: Research Square preprint supplement (doi:10.21203/rs.3.rs-6893597/v1), 2025-06-23
Supplement: Supplementary file 1 [file 0f224cf583e125b6793a6f9c.pdf]

# Supplementary Materials for

## Late Holocene overflow floods of the Yellow River led to the shrinkage of downstream lakes

**Authors:** Guoxuan Ma<sup>1</sup>, Niannian Fan<sup>\*1,2</sup>, Micheal J. Storzum<sup>3</sup>, Zhipeng Lin<sup>1</sup>,  
Ruihua Nie<sup>1</sup>, Xingnian Liu<sup>1</sup>.

### Affiliations:

<sup>1</sup> State Key Laboratory of Hydraulics and Mountain River Engineering, College of Water Resource  
& Hydropower, Sichuan University, Chengdu 610065, China

<sup>2</sup> Center for Archaeological Science, Sichuan University, Chengdu 610065, China

<sup>3</sup> School of History, Classics and Archaeology, Newcastle University, Newcastle upon Tyne NE1  
7RU, United Kingdom

### This PDF file includes:

- 1) Supplementary Table: Tab. S1
- 2) Supplementary Figures: Fig. S1 to S4.

18 **Supplementary Table**

19 **Table S1. Locations for our sampling sites**

| Sample site | Latitude   | Longitude   |
|-------------|------------|-------------|
| HZ          | 40.14823°N | 115.68407°E |
| WZ          | 40.12595°N | 115.70413°E |
| LX          | 40.12595°N | 115.70413°E |

20

21

22 **Supplementary Figure**

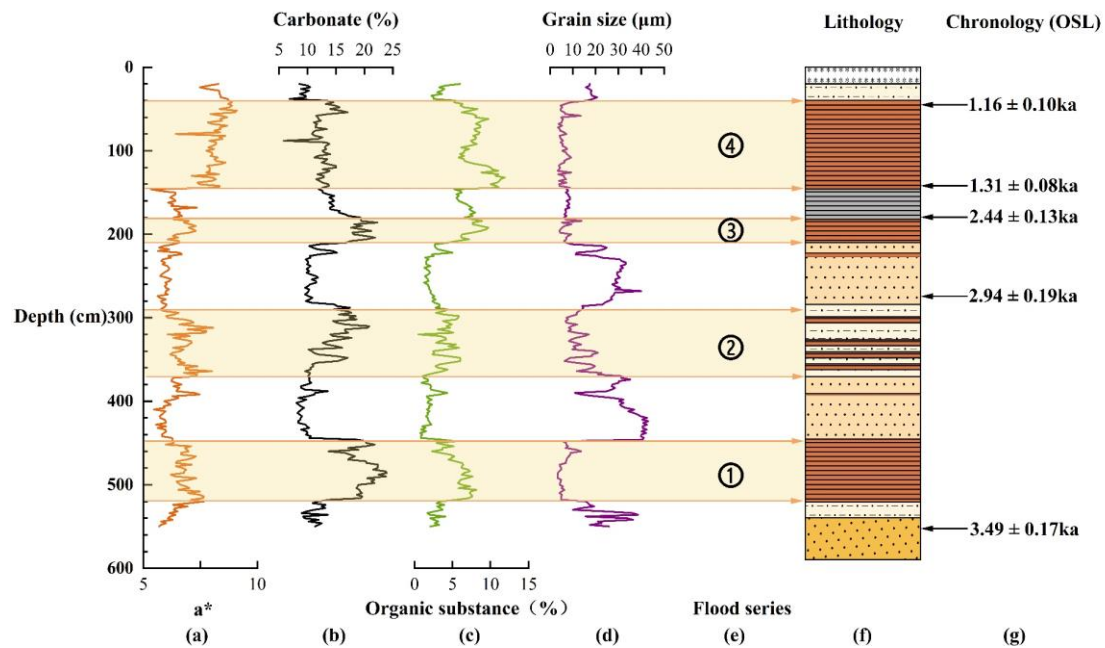

23  
24 **Fig. S1.** Stratigraphy of Yuying profile from paleo Daluze Lake. (a) chroma; (b)  
25 carbonate content; (c) organic content; (d) grain size; (e) flood series; (f) lithology; (g)  
26 chronology (modified from Li, 2016)  
27

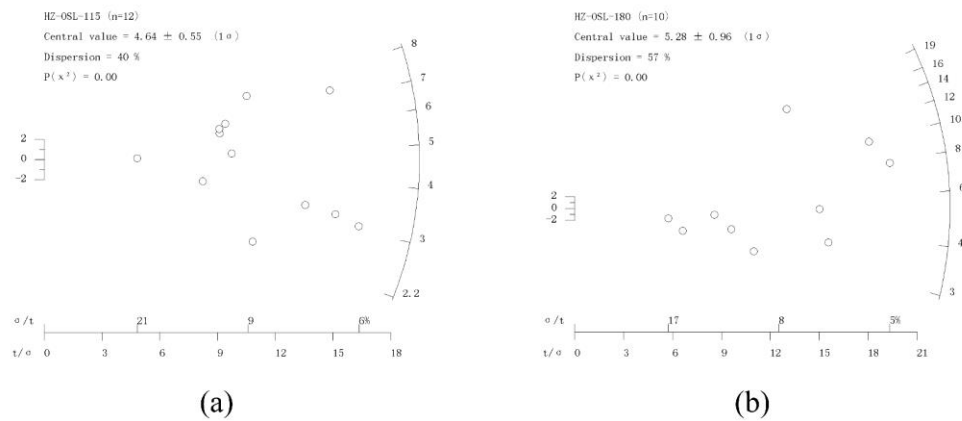

28  
29 **Fig. S2.** Radial plots and associated statistics of De values for samples from HZ  
30 section (a) HZ-OSL-115 (b) HZ-OSL-180.  
31

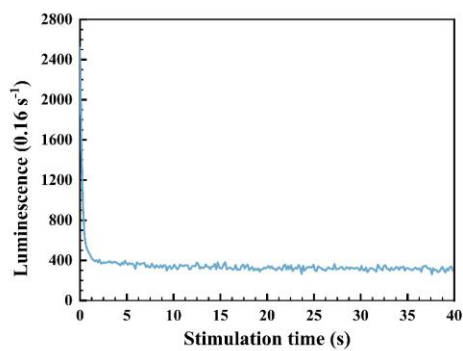

(a)

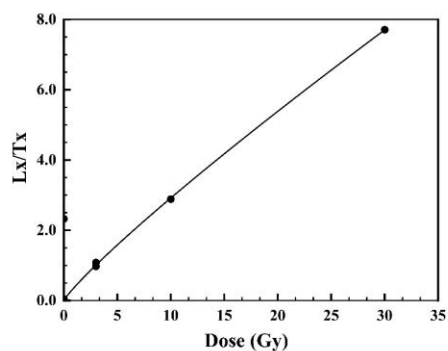

(b)

**Fig. S3.** Typical (a) decay curve and (b) dose response growth curve of OSL signals of quartz fractions.

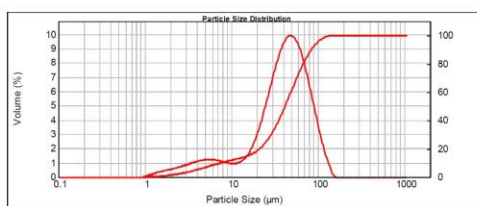

(a)

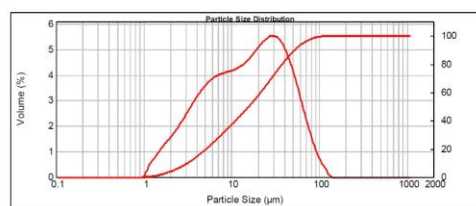

(b)

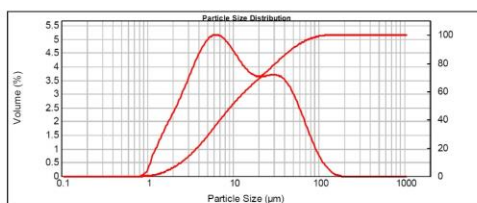

(c)

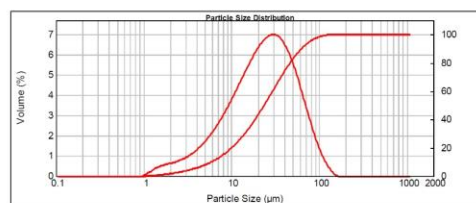

(d)

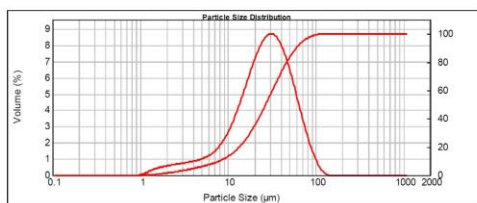

(e)

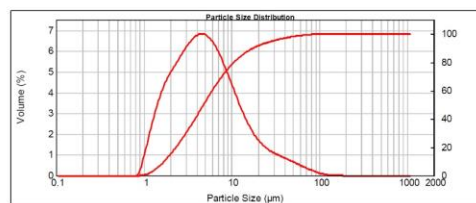

(f)

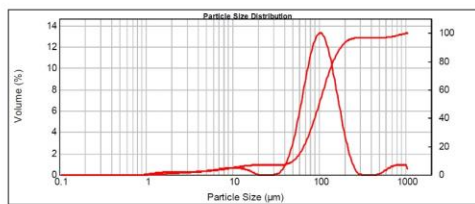

(g)

37 **Fig. S4.** The grain-size distributions of the sediments. (a) HZ-55 (Unit 5); (b) HZ-85  
38 (Unit 4); (c) HZ-105 (Unit 3); (d) HZ-170(Unit 2); (e) HZ-210 (Unit 1); (f) WZ; (g)  
39 LX  
40

## 41 **References**

42 Li, Y, Z., 2016. Palaeoflood events recorded by sediments from Daluze Paleolake in the Heibei plain since Late  
43 Holocene, China University of Geosciences Beijing, Beijing.  
44
